# Supplementary material for: The Impact of Mental Health and Sociodemographic Characteristics on Quality of Life and Life Satisfaction during the Second Year of the COVID-19 Pandemic—Results of a Population-Based Survey in Germany
Source: MDPI journal article supplement (doi:10.3390/ijerph19148734), 2022-07-18

**Table S1**

*Multicollinearity statistics for the final regression model (see Table 2)*

| Variable                          | Variance Inflation Factor (VIF) |
|-----------------------------------|---------------------------------|
| Gender                            | 1.03                            |
| Age                               | 1.35                            |
| Income                            | 1.07                            |
| Living alone                      | 1.10                            |
| Income loss                       | 1.05                            |
| Depression                        | 2.16                            |
| Anxiety                           | 2.12                            |
| Pre-existing somatic disorder     | 1.40                            |
| Pre-existing psychiatric disorder | 1.25                            |

*Variance Inflation factors above 10 represent strong evidence for multicollinearity. Durbin Watson statistic=0.81 (values below 0.7 and above 2.3 indicate autocorrelation of residuals).*

**Figure S1**

*Distribution of residuals from the final regression model ( $M=0$ ,  $SD=1$ ,  $N=2350$ )*

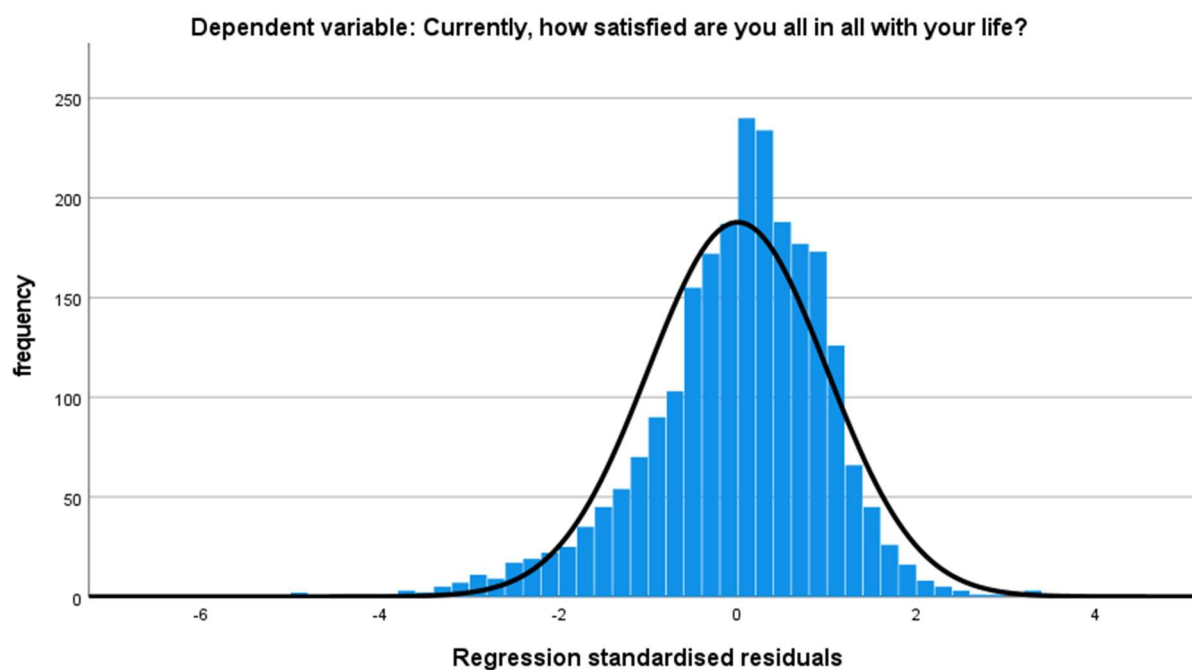**Figure S2**

*Scatterplot of residuals for the final regression model*

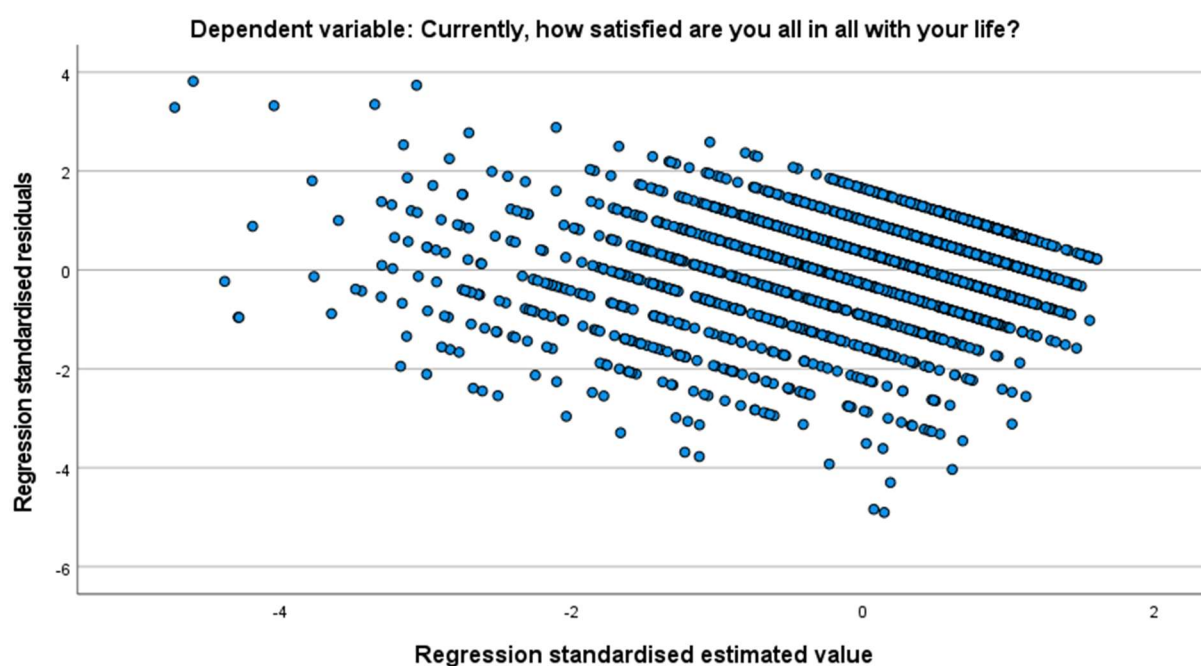

**Table S2**

*Multicollinearity statistics for the final regression model in the group with low quality of life (see Table 3)*

| Variable                          | Variance Inflation Factor (VIF) |
|-----------------------------------|---------------------------------|
| Gender                            | 1.07                            |
| Age                               | 1.50                            |
| Income                            | 1.10                            |
| Living alone                      | 1.20                            |
| Income loss                       | 1.13                            |
| Depression                        | 1.86                            |
| Anxiety                           | 2.01                            |
| Pre-existing somatic disorder     | 1.28                            |
| Pre-existing psychiatric disorder | 1.20                            |

*Variance Inflation factors above 10 represent strong evidence for multicollinearity. Durbin Watson statistic=0.81(values below 0.7 and above 2.3 indicate autocorrelation of residuals).*

**Figure S3**

*Distribution of residuals from the final regression model in the group with low quality of life*  
( $M=0$ ,  $SD=1$ ,  $N=396$ )

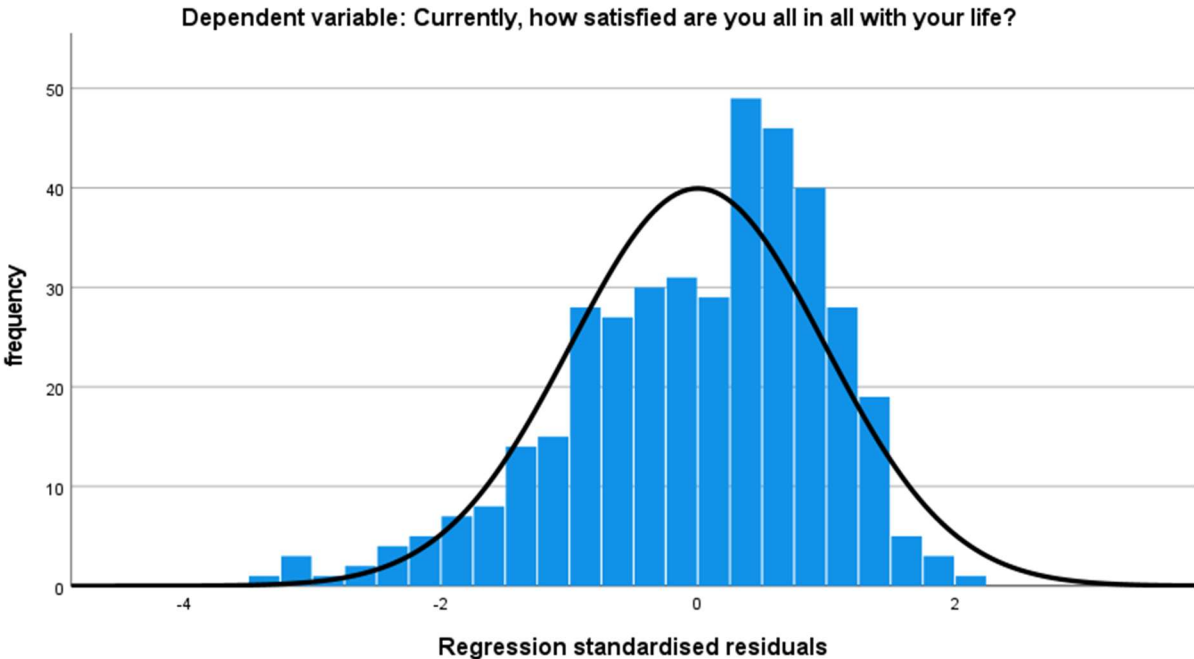

Figure S4

*Scatterplot of residuals of the final regression model in the group with low quality of life*

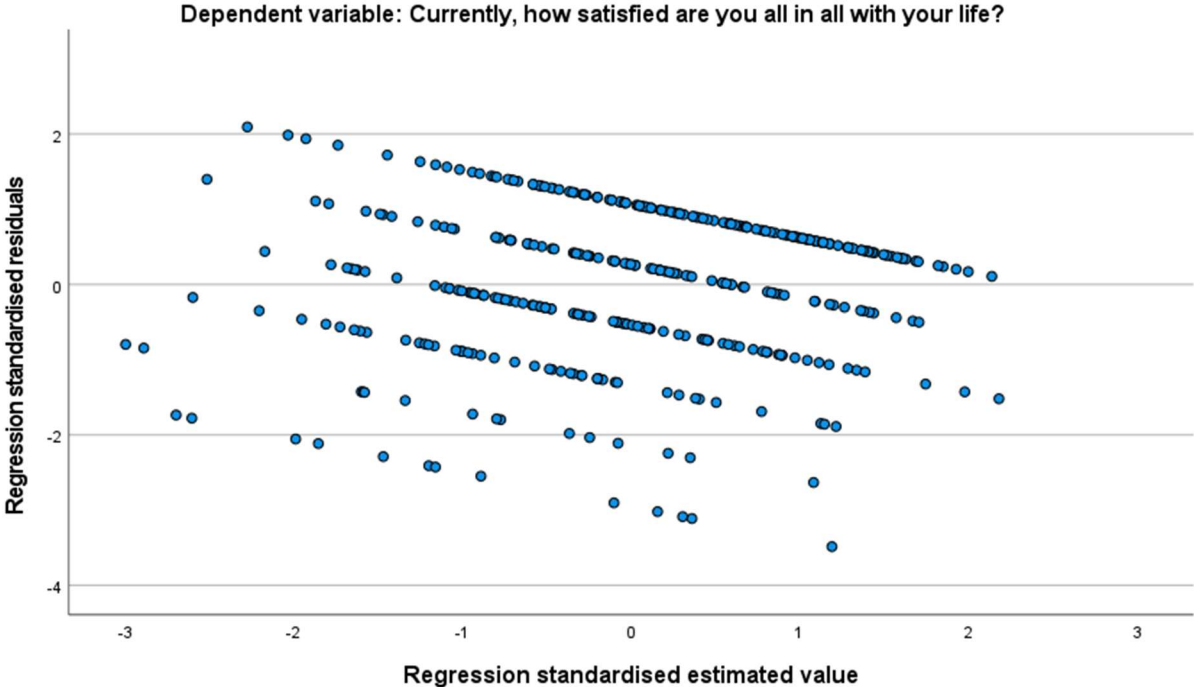

Supplement: s1 [file s1 › ijerph-1797236-supplementary.pdf]
