# Supplementary material for: The Impact of Mental Health and Sociodemographic Characteristics on Quality of Life and Life Satisfaction during the Second Year of the COVID-19 Pandemic—Results of a Population-Based Survey in Germany
Source: MDPI journal article supplement (doi:10.3390/ijerph19148734), 2022-07-18
Supplement: s1 [file s1]

Archive with 1 entries (1 files):
- ijerph-1797236-supplementary.pdf
